# Supplementary material for: Highly conductive n-type CH3NH3PbI3 single crystals doped with bismuth donors
Source: Royal Society of Chemistry journal article supplement (doi:10.1039/c9tc06854f), 2020-01-01
Supplement: c9tc06854f1.pdf [file c9tc06854f1.pdf]

Supporting Information

## **Highly conductive n-type CH<sub>3</sub>NH<sub>3</sub>PbI<sub>3</sub> single crystals doped with bismuth donors**

Chen Li<sup>a</sup>, Xin Chen<sup>b</sup>, Ning Li<sup>a</sup>, Jialiang Liu<sup>a</sup>, Beilei Yuan<sup>a</sup>, Yujiao Li,<sup>b</sup> Mei Wang<sup>b</sup>,  
Yangqing Wu<sup>b</sup>, Bingqiang Cao<sup>a,b,\*</sup>

<sup>a</sup> Materials Research Center for Energy and Photoelectrochemical Conversion, School of  
Material Science and Engineering, University of Jinan, Jinan, 250022, Shandong, China

<sup>b</sup> School of Physics and Physical Engineering, Shandong Provincial Key Laboratory of Laser  
Polarization and Information Technology, Qufu Normal University, Qufu, 273165, Shandong,  
China

\*Email: mse\_caobq@ujn.edu.cn

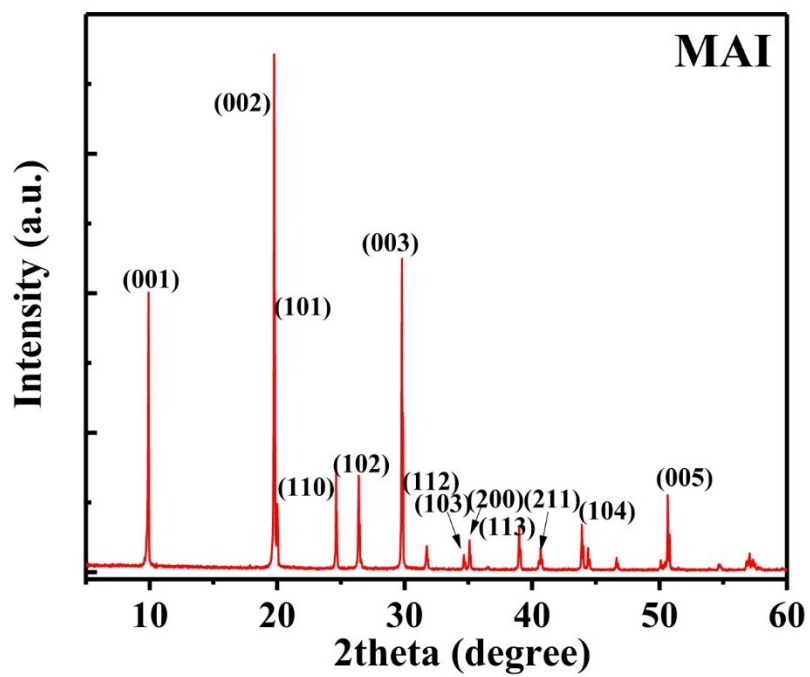

**Figure S1.** XRD pattern of synthesized  $\text{CH}_3\text{NH}_3\text{I}$  powder.

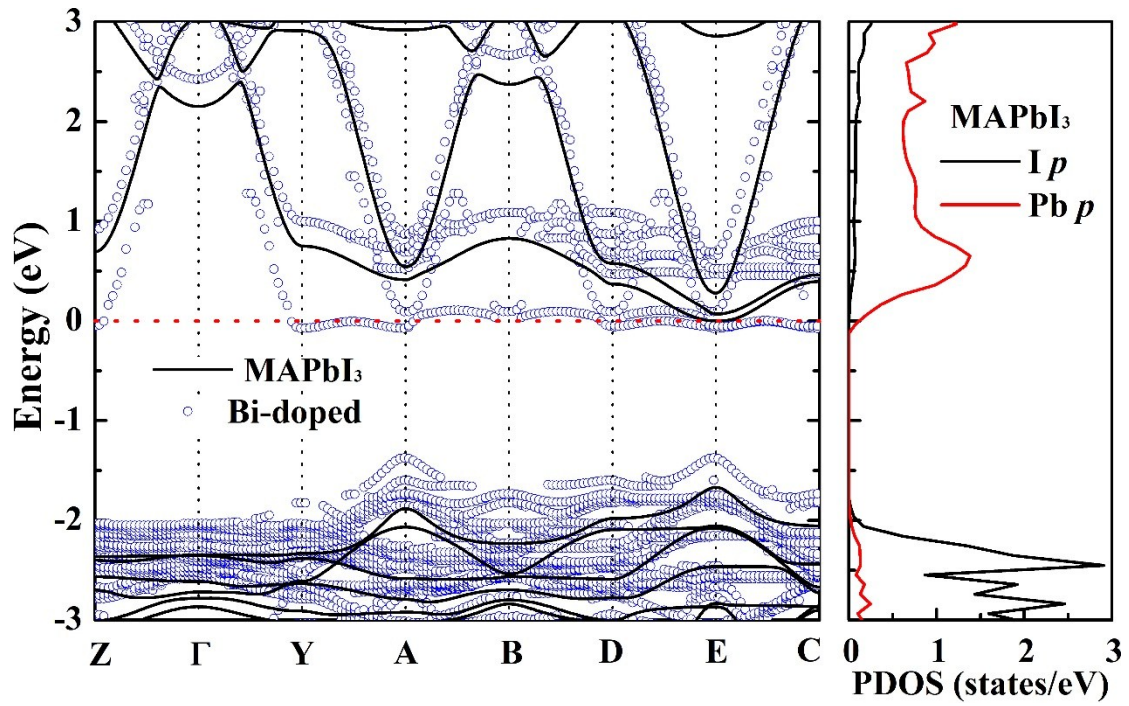

**Figure S2.** Calculated band structures and partial density of states (PDOS) for pristine MAPbI<sub>3</sub>. For a clear comparison with band dispersions of Bi doping (blue circled lines), we shift Fermi level of pristine crystal to the conduction band minimum as denoted by the red dashed line at zero energy.

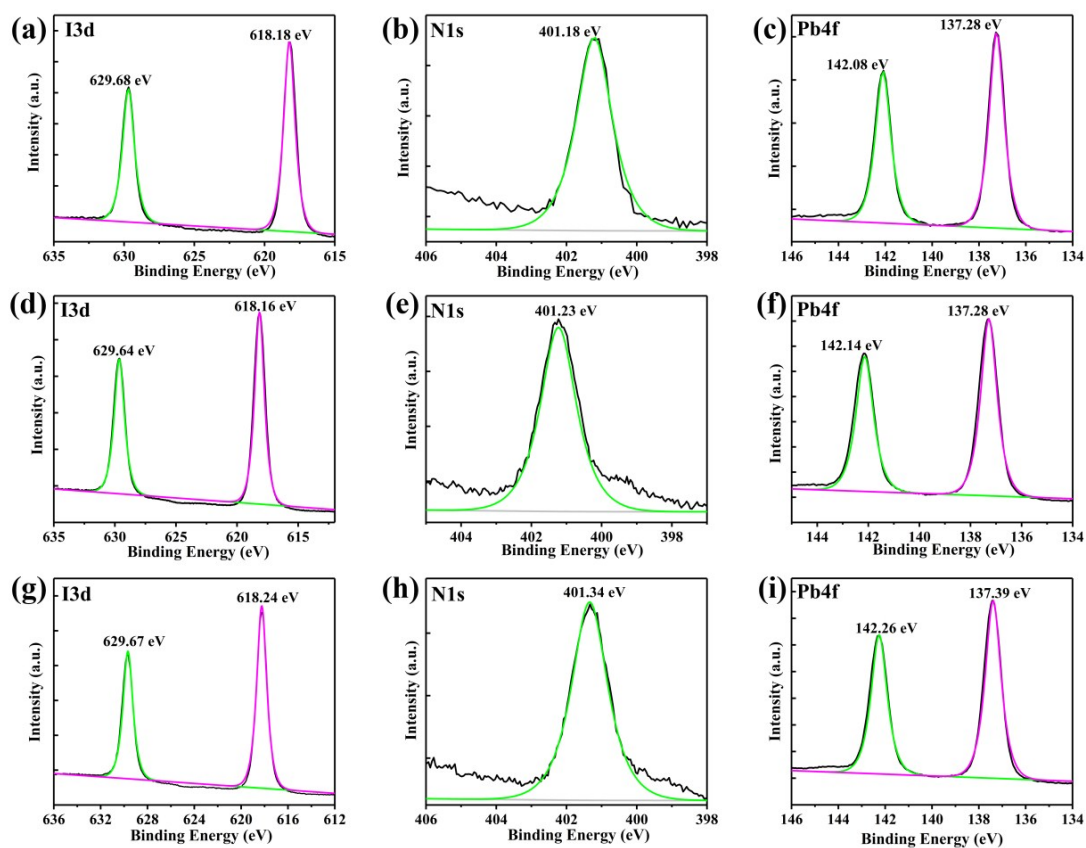

**Figure S3.** High-resolution XPS spectra of core level (a) I 3d, (b) N 1s, (c) Pb 4f in the un-doped MAPbI<sub>3</sub>; High-resolution XPS spectra of core level (d) I 3d, (e) N 1s, (f) Pb 4f in the MAPbI<sub>3</sub> doped with 0.5% Bi<sup>3+</sup>; High-resolution XPS spectra of core level (g) I 3d, (h) N 1s, (i) Pb 4f in the MAPbI<sub>3</sub> doped with 5% Bi<sup>3+</sup>.

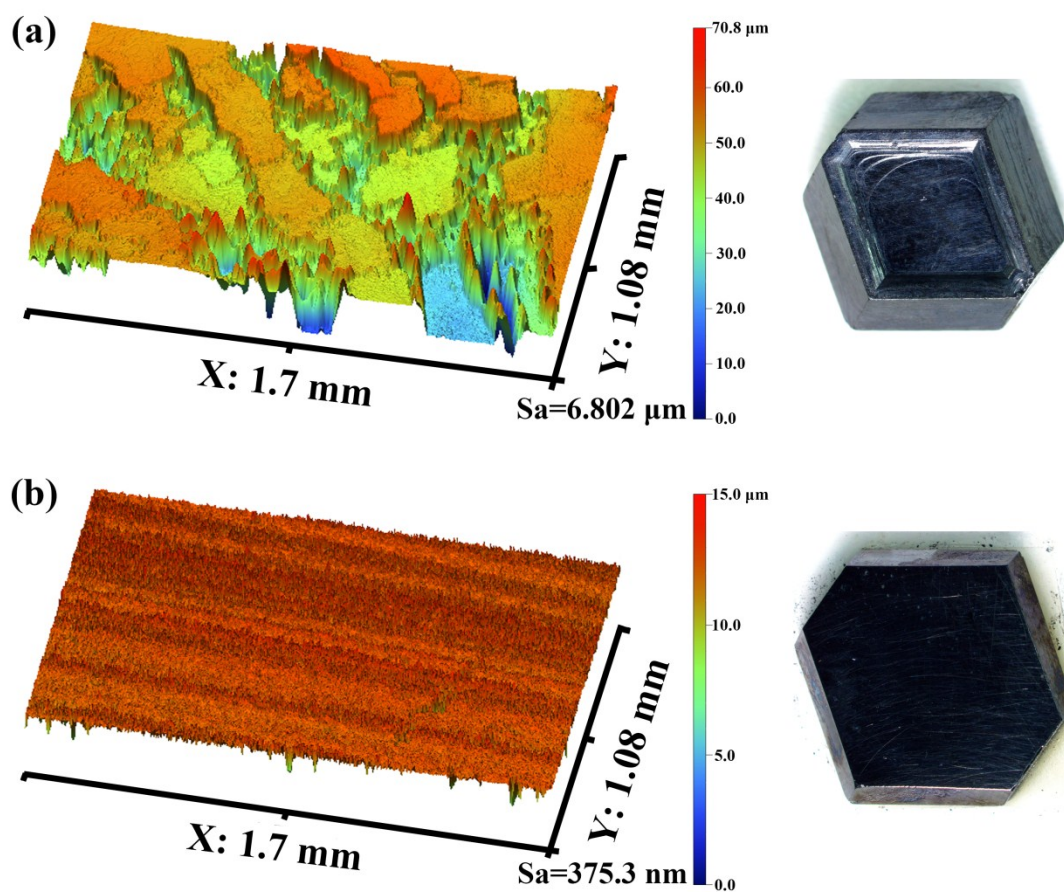

**Figure S4.** 3D profilometer images and surface topography photographs of (a) Unpolished (b) polished MAPbI<sub>3</sub> crystals; the average roughness is 6.802  $\mu\text{m}$  and 375.3 nm, respectively.

| (a) Final average        |                                                  | Geometry C |            | Geometry D |            |            |            |
|--------------------------|--------------------------------------------------|------------|------------|------------|------------|------------|------------|
|                          |                                                  | Mean value | Limit      | Mean value | Limit      |            |            |
| V <sub>h</sub>           | Hall voltage [V]                                 | 7.7716E-4  |            | 4.1507E-3  |            |            |            |
| n                        | Carrier type                                     | P          | N/A        | P          | N/A        |            |            |
| n <sub>sheet</sub>       | Carrier concentration [1/cm <sup>3</sup> ]       | 9.190E9    |            | 1.708E9    |            |            |            |
| R <sub>sheet</sub>       | Sheet carrier concentration [1/cm <sup>2</sup> ] | 1.011E9    |            | 1.878E8    |            |            |            |
| R <sub>h</sub>           | Hall coefficient [cm <sup>3</sup> /C]            | 6.792E8    |            | 3.655E9    |            |            |            |
| R <sub>sheet</sub>       | Sheet Hall coefficient [cm <sup>3</sup> /C]      | 6.174E9    |            | 3.323E10   |            |            |            |
| Current reversal results |                                                  | Geometry C |            | Geometry D |            |            |            |
|                          |                                                  | P1-N1      | P2-N1      | P1-N1      | P2-N1      |            |            |
| V <sub>h</sub>           | Hall voltage [V]                                 | 7.3406E-4  | 8.2184E-4  | 2.7512E-3  | 5.5539E-3  |            |            |
|                          | Phase [deg.]                                     | 9.0        | 3.8        | -1.7       | -5.3       |            |            |
| Average measurements     |                                                  | Geometry C |            |            | Geometry D |            |            |
|                          |                                                  | I+(P1)     | I-(N1)     | I+(P2)     | I+(P1)     | I-(N1)     | I+(P2)     |
|                          | Voltage [V]                                      | 1.8000E-4  | 1.6461E-3  | 1.2042E-4  | 4.6618E-3  | 1.0544E-3  | 1.0209E-2  |
|                          | Standard deviation of voltage [V]                | N/A        | N/A        | N/A        | N/A        | N/A        | N/A        |
|                          | Phase [deg.]                                     | 180.0      | -172.0     | -85.2      | 5.5        | 144.7      | -2.4       |
|                          | Current [A]                                      | 9.9964E-10 | -1.0013E-9 | 1.0005E-9  | 9.7135E-10 | -1.0031E-9 | 9.9472E-10 |
|                          | Misalignment voltage [DC V]                      | N/A        | N/A        | N/A        | N/A        | N/A        | N/A        |
|                          | Current lead voltage [DC V]                      | N/A        | N/A        | N/A        | N/A        | N/A        | N/A        |

(b)

| Final average            |                                                  | Geometry C |            | Geometry D |            |            |           |
|--------------------------|--------------------------------------------------|------------|------------|------------|------------|------------|-----------|
|                          |                                                  | Mean value | Limit      | Mean value | Limit      |            |           |
| V <sub>h</sub>           | Hall voltage [V]                                 | 2.0922E-3  |            | 2.0231E-3  |            |            |           |
| n                        | Carrier type                                     | N          | N/A        | N          | N/A        |            |           |
| n                        | Carrier concentration [1/cm <sup>3</sup> ]       | 6.517E11   |            | 7.709E11   |            |            |           |
| R <sub>sheet</sub>       | Sheet carrier concentration [1/cm <sup>2</sup> ] | 6.517E10   |            | 7.709E10   |            |            |           |
| R <sub>h</sub>           | Hall coefficient [cm <sup>3</sup> /C]            | 9.577E6    |            | 8.096E6    |            |            |           |
| R <sub>sheet</sub>       | Sheet Hall coefficient [cm <sup>3</sup> /C]      | 9.577E7    |            | 8.096E7    |            |            |           |
| Current reversal results |                                                  | Geometry C |            | Geometry D |            |            |           |
|                          |                                                  | P1-N1      | P2-N1      | P1-N1      | P2-N1      |            |           |
| V <sub>h</sub>           | Hall voltage [V]                                 | 2.9213E-2  | 2.5029E-2  | 9.9308E-3  | 5.8845E-3  |            |           |
|                          | Phase [deg.]                                     | -178.8     | -150.1     | -10.5      | -88.0      |            |           |
| Average measurements     |                                                  | Geometry C |            |            | Geometry D |            |           |
|                          |                                                  | I+(P1)     | I-(N1)     | I+(P2)     | I+(P1)     | I-(N1)     | I+(P2)    |
|                          | Voltage [V]                                      | 4.7681E-2  | 2.1729E-1  | 1.6468E-1  | 1.0611E-1  | 1.6723E-1  | 1.4482E-1 |
|                          | Standard deviation of voltage [V]                | N/A        | N/A        | N/A        | N/A        | N/A        | N/A       |
|                          | Phase [deg.]                                     | -163.9     | -0.9       | -66.8      | -159.5     | -179.7     | -170.0    |
|                          | Current [A]                                      | 4.9991E-7  | -3.8757E-7 | 4.9985E-7  | 4.9994E-7  | -3.6024E-7 | 4.9992E-7 |
|                          | Misalignment voltage [DC V]                      | N/A        | N/A        | N/A        | N/A        | N/A        | N/A       |
|                          | Current lead voltage [DC V]                      | N/A        | N/A        | N/A        | N/A        | N/A        | N/A       |

(c)

| Final average            |                                                  | Geometry C |            | Geometry D |            |            |           |
|--------------------------|--------------------------------------------------|------------|------------|------------|------------|------------|-----------|
|                          |                                                  | Mean value | Limit      | Mean value | Limit      |            |           |
| V <sub>h</sub>           | Hall voltage [V]                                 | 1.9405E-5  |            | 8.2206E-5  |            |            |           |
| n                        | Carrier type                                     | N          | N/A        | N          | N/A        |            |           |
| n                        | Carrier concentration [1/cm <sup>3</sup> ]       | 1.348E13   |            | 3.182E12   |            |            |           |
| R <sub>sheet</sub>       | Sheet carrier concentration [1/cm <sup>2</sup> ] | 2.022E12   |            | 4.773E11   |            |            |           |
| R <sub>h</sub>           | Hall coefficient [cm <sup>3</sup> /C]            | 4.630E5    |            | 1.961E6    |            |            |           |
| R <sub>sheet</sub>       | Sheet Hall coefficient [cm <sup>3</sup> /C]      | 3.087E6    |            | 1.308E7    |            |            |           |
| Current reversal results |                                                  | Geometry C |            | Geometry D |            |            |           |
|                          |                                                  | P1-N1      | P2-N1      | P1-N1      | P2-N1      |            |           |
| V <sub>h</sub>           | Hall voltage [V]                                 | 1.5811E-5  | 5.4601E-5  | 1.5008E-4  | 4.5069E-5  |            |           |
|                          | Phase [deg.]                                     | -71.6      | 105.9      | -30.0      | -109.4     |            |           |
| Average measurements     |                                                  | Geometry C |            |            | Geometry D |            |           |
|                          |                                                  | I+(P1)     | I-(N1)     | I+(P2)     | I+(P1)     | I-(N1)     | I+(P2)    |
|                          | Voltage [V]                                      | 4.6098E-5  | 7.6322E-5  | 1.8385E-4  | 3.0992E-4  | 6.5192E-5  | 3.0414E-5 |
|                          | Standard deviation of voltage [V]                | N/A        | N/A        | N/A        | N/A        | N/A        | N/A       |
|                          | Phase [deg.]                                     | 130.6      | 121.6      | 112.4      | -17.9      | -57.5      | -80.5     |
|                          | Current [A]                                      | 1.0000E-7  | -1.0002E-7 | 1.0000E-7  | 1.0001E-7  | -1.0002E-7 | 1.0001E-7 |
|                          | Misalignment voltage [DC V]                      | N/A        | N/A        | N/A        | N/A        | N/A        | N/A       |
|                          | Current lead voltage [DC V]                      | N/A        | N/A        | N/A        | N/A        | N/A        | N/A       |

(d)

| Final average            |                                                  | Geometry C |            | Geometry D |            |            |           |
|--------------------------|--------------------------------------------------|------------|------------|------------|------------|------------|-----------|
|                          |                                                  | Mean value | Limit      | Mean value | Limit      |            |           |
| V <sub>h</sub>           | Hall voltage [V]                                 | 5.0990E-6  |            | 6.2948E-6  |            |            |           |
| n                        | Carrier type                                     | N          | N/A        | N          | N/A        |            |           |
| n                        | Carrier concentration [1/cm <sup>3</sup> ]       | 3.848E13   |            | 3.117E13   |            |            |           |
| R <sub>sheet</sub>       | Sheet carrier concentration [1/cm <sup>2</sup> ] | 7.696E12   |            | 6.234E12   |            |            |           |
| R <sub>h</sub>           | Hall coefficient [cm <sup>3</sup> /C]            | 1.622E5    |            | 2.002E5    |            |            |           |
| R <sub>sheet</sub>       | Sheet Hall coefficient [cm <sup>3</sup> /C]      | 8.110E5    |            | 1.001E6    |            |            |           |
| Current reversal results |                                                  | Geometry C |            | Geometry D |            |            |           |
|                          |                                                  | P1-N1      | P2-N1      | P1-N1      | P2-N1      |            |           |
| V <sub>h</sub>           | Hall voltage [V]                                 | 4.1231E-6  | 6.7082E-6  | 8.5000E-6  | 5.5902E-6  |            |           |
|                          | Phase [deg.]                                     | 104.0      | 63.4       | 151.9      | -153.4     |            |           |
| Average measurements     |                                                  | Geometry C |            |            | Geometry D |            |           |
|                          |                                                  | I+(P1)     | I-(N1)     | I+(P2)     | I+(P1)     | I-(N1)     | I+(P2)    |
|                          | Voltage [V]                                      | 1.5133E-5  | 2.3000E-5  | 1.2530E-5  | 6.4031E-6  | 1.5620E-5  | 1.7000E-5 |
|                          | Standard deviation of voltage [V]                | N/A        | N/A        | N/A        | N/A        | N/A        | N/A       |
|                          | Phase [deg.]                                     | -97.6      | -90.0      | -61.4      | -141.3     | -50.2      | -90.0     |
|                          | Current [A]                                      | 1.0000E-7  | -1.0002E-7 | 1.0000E-7  | 1.0000E-7  | -1.0002E-7 | 1.0000E-7 |
|                          | Misalignment voltage [DC V]                      | N/A        | N/A        | N/A        | N/A        | N/A        | N/A       |
|                          | Current lead voltage [DC V]                      | N/A        | N/A        | N/A        | N/A        | N/A        | N/A       |

| Final results      |            |
|--------------------|------------|
|                    | Mean value |
| μ <sub>h</sub>     | 1.543E1    |
| n                  | P          |
| n                  | 2.886E9    |
| R <sub>sheet</sub> | 3.175E8    |
| R <sub>h</sub>     | 2.162E9    |
| R <sub>sheet</sub> | 1.966E10   |
| p                  | 1.402E8    |
| p <sub>sheet</sub> | 1.274E9    |
| V <sub>h</sub>     | 2.458E-3   |
|                    | -2.5       |
|                    | N/A        |

| Final results      |            |
|--------------------|------------|
|                    | Mean value |
| μ <sub>h</sub>     | 3.747E0    |
| n                  | N          |
| n                  | 7.103E11   |
| R <sub>sheet</sub> | 7.103E10   |
| R <sub>h</sub>     | 8.799E7    |
| R <sub>sheet</sub> | 8.799E8    |
| p                  | 8.318E6    |
| p <sub>sheet</sub> | 8.318E8    |
| V <sub>h</sub>     | 6.309E-5   |
|                    | -154.1     |
|                    | N/A        |

| Final results      |            |
|--------------------|------------|
|                    | Mean value |
| μ <sub>h</sub>     | 1.109E0    |
| n                  | N          |
| n                  | 7.927E12   |
| R <sub>sheet</sub> | 1.189E12   |
| R <sub>h</sub>     | 7.874E5    |
| R <sub>sheet</sub> | 5.249E6    |
| p                  | 7.100E5    |
| p <sub>sheet</sub> | 4.733E6    |
| V <sub>h</sub>     | 3.300E-5   |
|                    | -37.3      |
|                    | N/A        |

| Final results      |            |
|--------------------|------------|
|                    | Mean value |
| μ <sub>h</sub>     | 2.935E-1   |
| n                  | N          |
| n                  | 5.040E13   |
| R <sub>sheet</sub> | 1.008E13   |
| R <sub>h</sub>     | 1.238E5    |
| R <sub>sheet</sub> | 6.192E5    |
| p                  | 4.220E5    |
| p <sub>sheet</sub> | 2.110E6    |
| V <sub>h</sub>     | 3.893E-6   |
|                    | 132.4      |
|                    | N/A        |

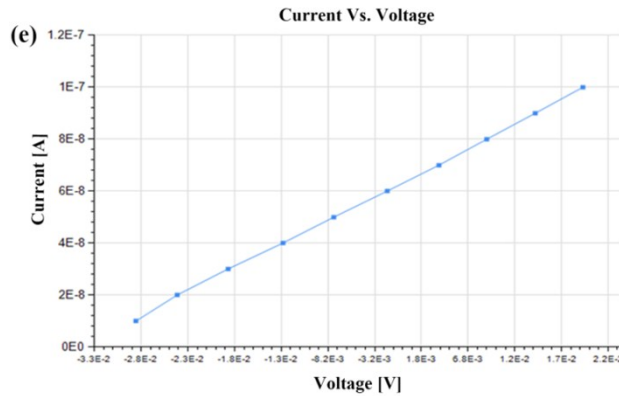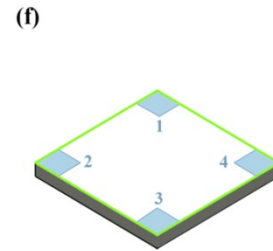

**Figure S5.** Original log sheet of the Hall Effect measurement for (a) Un-doped, (d) 1% Bi<sup>3+</sup> (c) 5% Bi<sup>3+</sup> and (d) 10% Bi<sup>3+</sup> doped MAPbI<sub>3</sub>. (e) The current-voltage properties to be used for contact check. (f) The contact configuration used in Hall Effect measurements (the blue corners are the contacts).



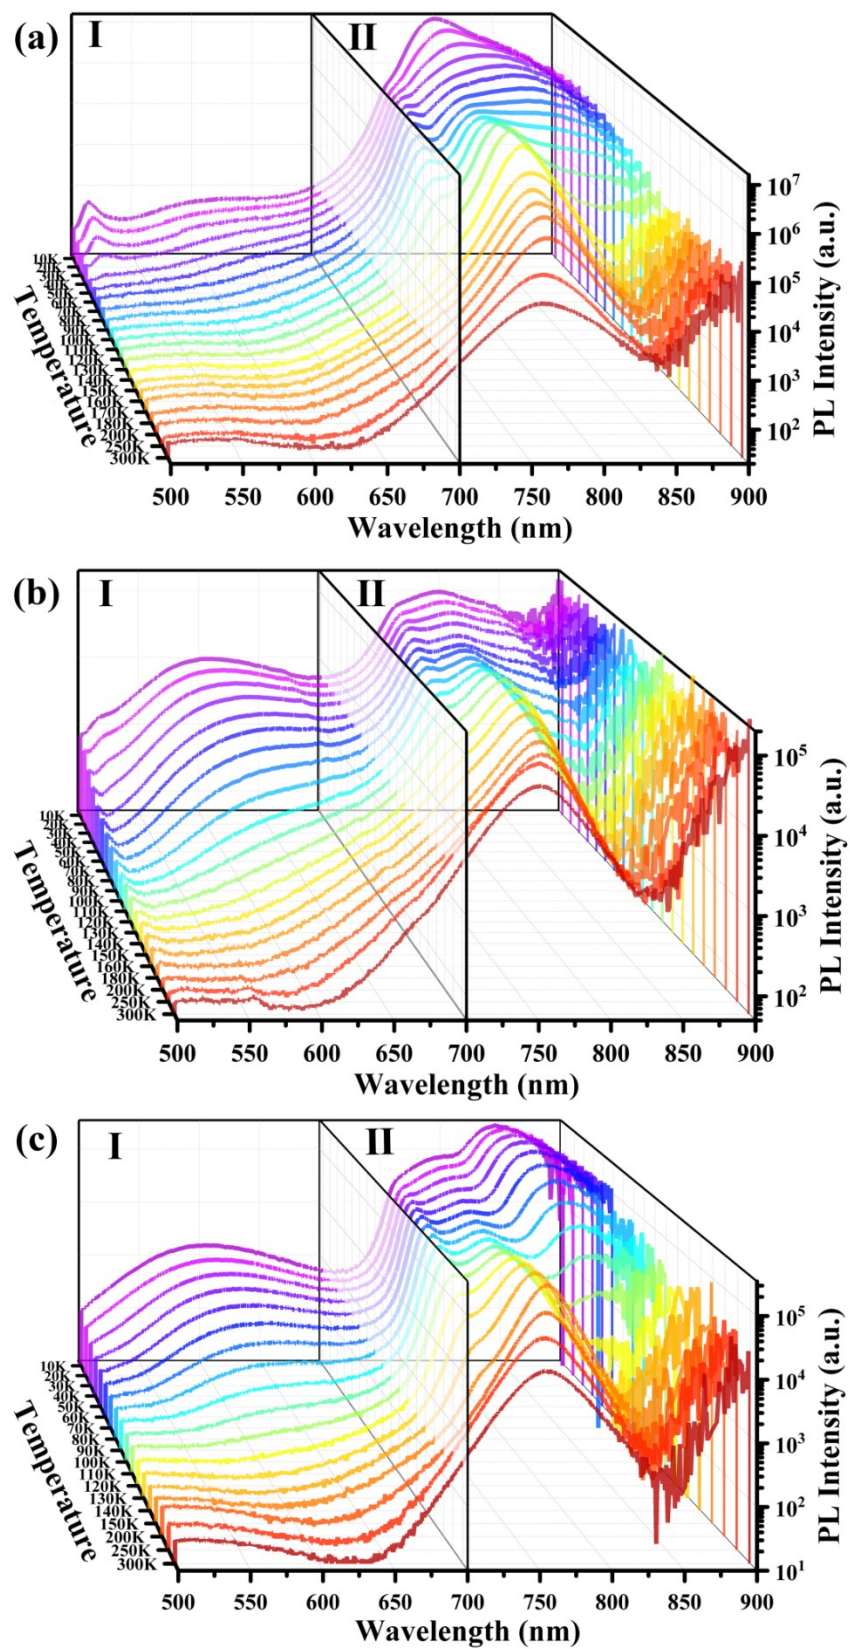

**Figure S6.** Temperature-dependent PL spectra of (a) Un-doped, (b) 5% Bi<sup>3+</sup> and (c) 10% Bi<sup>3+</sup> doped MAPbI<sub>3</sub> for temperatures in the 10-300 K.

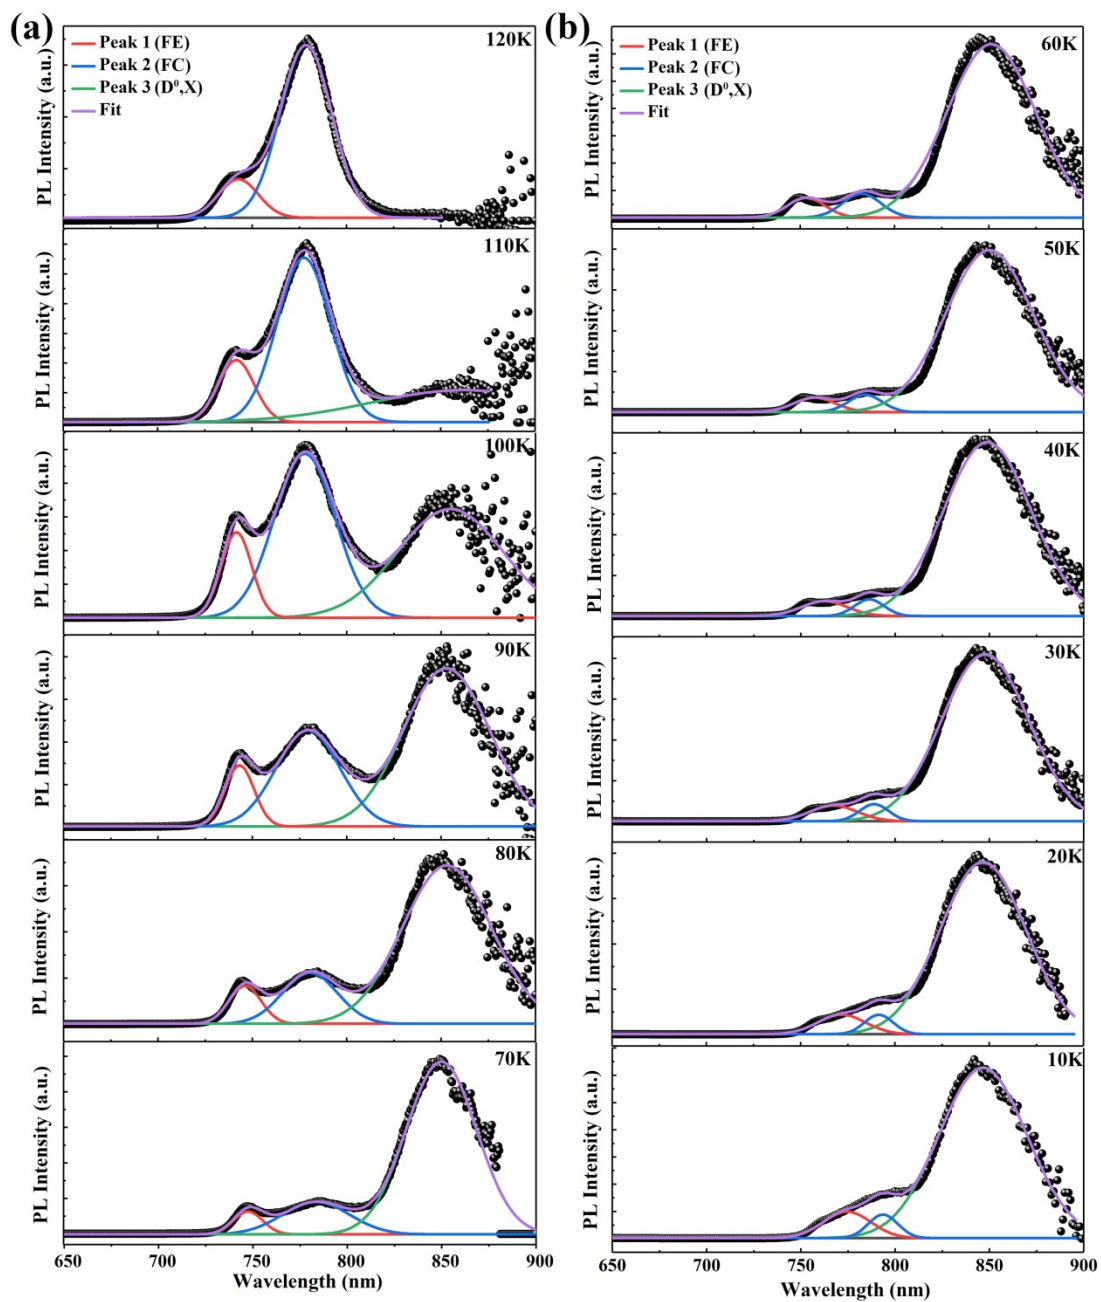

**Figure S7.** Typical Gaussian-fitting analysis of the PL spectrum, for temperatures in the 10-120 K range ((a) (b)).



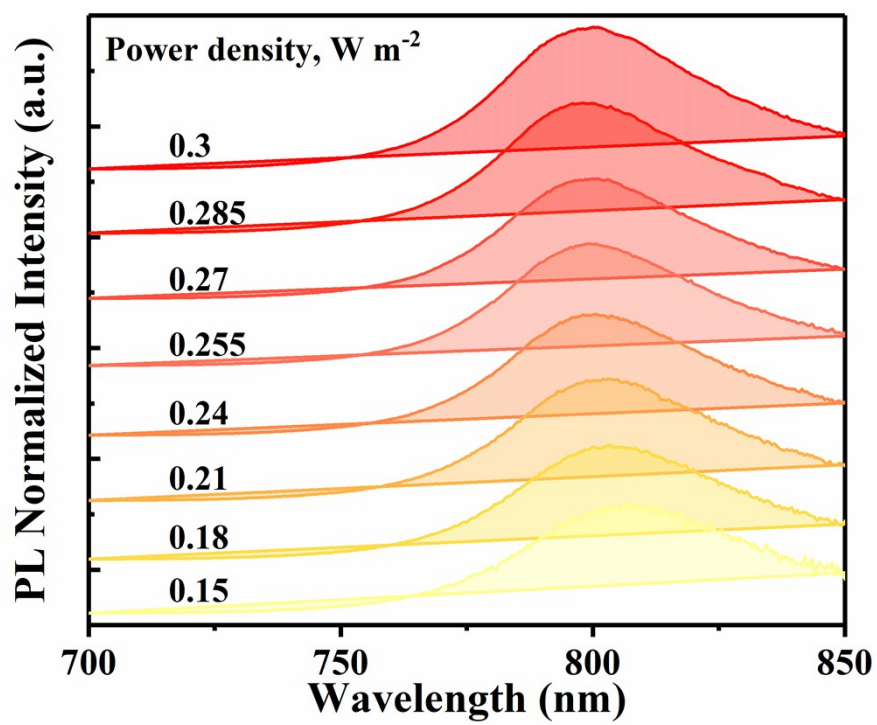

**Figure S8.** The un-doped crystals PL normalized spectra at 10 K measured at different power densities.

**Table S1.** Decay parameters and average lifetime according to a double exponential functions fitting model of the PL decay curves obtained from the samples.

| Sample |    | $\tau_1$ ( $\mu$ s) | $\tau_2$ ( $\mu$ s) | $R^2$ |
|--------|----|---------------------|---------------------|-------|
| 0%     | Bi | 14.1                | 0.36                | 0.96  |
| 0.5%   | Bi | 10.9                | 1.11                | 0.99  |
| 1%     | Bi | 7.7                 | 0.49                | 0.99  |
| 5%     | Bi | 4.29                | 0.26                | 0.96  |
| 10%    | Bi | 3.73                | 0.59                | 0.99  |

**Supporting Note 1:**

When the temperature is further below 150 K, Peak II exhibits blueshift and then redshift behavior. This behavior can be understood within the Bose-Einstein model<sup>1</sup>,

$$E_{A2}(T) - E_{A2}^0 = \frac{\partial E_{A2}(T)}{\partial V} \frac{\partial V}{\partial T} T + A_{EP} \left[ \frac{2}{(\exp(\hbar\omega/kT) - 1)} + 1 \right] \quad (1)$$

The first term in this equation describes the change in the band gap associated with the

thermal expansion of the lattice. As the  $\frac{\partial V}{\partial T}$  of MAPbI<sub>3</sub> is positive, the band gap increases with increasing lattice constant.<sup>2,3</sup> The second term accounts for the band gap renormalization due to the electron-phonon coupling, where  $A_{EP}$  is the strength of the coupling.  $A_{EP}$  is typically negative and give rise to an increase in band gap with the decrease of temperature.<sup>4</sup> In the temperature range of 150 K-110 K, the electron-phonon coupling plays a major role, and the abnormal phenomena that the bandgap increase with the decrease of temperature occurs. When the temperature continues to reduce from 110 K to 10 K, the lattice vibrations is suppressed, and the phonon number is reduced. Hence, the peak redshift (18 nm) originates from the band gap narrowing caused by the lattice contraction.

## SUPPORTING REFERENCES:

1. Lautenschlager, Garriga, Logothetidis and Cardona, *Phy. Rev. B, Condens. Matter*, 1987, **35**, 9174-9189.
2. M. I. Dar, G. Jacopin, S. Meloni, A. Mattoni, N. Arora, A. Boziki, S. M. Zakeeruddin, U. Rothlisberger and M. Gratzel, *Sci. Adv.*, 2016, **2**, 9.
3. S. Meloni, G. Palermo, N. Ashari-Astani, M. Gratzel and U. Rothlisberger, *J. Mater. Chem. A*, 2016, **4**, 15997-16002.
4. K. Wei, Z. J. Xu, R. Z. Chen, X. Zheng, X. G. Cheng and T. Jiang, *Opt. Lett.*, 2016, **41**, 3821-3824.
